# Supplementary material
Source: publisher site journal article supplement (https://www.dovepress.com/article/358387)
Supplement: Supplementary file 1 [file get_supplementary_file.php]

**Table S1. circRNA-miRNA interaction pairs**

| <b>Up-regulation</b> | <b>Down-regulation</b> |
|----------------------|------------------------|
| hsa_circ_0099630     | hsa-miR-339-5p         |
| hsa_circ_0099630     | hsa-miR-370-3p         |
| hsa_circ_0099630     | hsa-miR-6856-5p        |
| hsa_circ_0099630     | hsa-miR-671-3p         |
| hsa_circ_0099630     | hsa-miR-7706           |
| hsa_circ_0101692     | hsa-miR-23b-5p         |
| hsa_circ_0101692     | hsa-miR-23a-5p         |
| hsa_circ_0101692     | hsa-miR-3605-5p        |
| hsa_circ_0101692     | hsa-miR-181c-3p        |
| hsa_circ_0131845     | hsa-miR-769-5p         |
| hsa_circ_0131845     | hsa-miR-769-3p         |
| hsa_circ_0131845     | hsa-miR-6856-5p        |
| hsa_circ_0031594     | hsa-miR-23b-5p         |
| hsa_circ_0031594     | hsa-miR-1260b          |
| hsa_circ_0031594     | hsa-miR-23a-5p         |
| hsa_circ_0031594     | hsa-miR-224-5p         |
| hsa_circ_0031594     | hsa-miR-181c-3p        |
| hsa_circ_0031594     | hsa-miR-6507-5p        |
| hsa_circ_0031594     | hsa-miR-6793-5p        |
| hsa_circ_0031594     | hsa-miR-518c-5p        |

**Table S1. circRNA-miRNA interaction pairs**

| <b>Down-regulation</b> | <b>Up-regulation</b> |
|------------------------|----------------------|
| hsa_circ_0130618       | hsa-mir-3936         |
| hsa_circ_0130619       | hsa-mir-4675         |
| hsa_circ_0130619       | hsa-miR-6792-3p      |
| hsa_circ_0130619       | hsa-mir-3936         |
| hsa_circ_0130619       | hsa-miR-619-3p       |
| hsa_circ_0130619       | hsa-mir-765          |
| hsa_circ_0130619       | hsa-miR-3124-3p      |
| hsa_circ_0130619       | hsa-mir-2113         |
| hsa_circ_0130619       | hsa-miR-1236-3p      |
| hsa_circ_0130619       | hsa-miR-7106-3p      |
| hsa_circ_0130619       | hsa-miR-4649-3p      |
| hsa_circ_0130619       | hsa-mir-4487         |
| hsa_circ_0130619       | hsa-miR-1976         |
| hsa_circ_0130619       | hsa-mir-4417         |
| hsa_circ_0130619       | hsa-miR-877-5p       |
| hsa_circ_0130619       | hsa-miR-1207-5p      |
| hsa_circ_0130619       | hsa-miR-6775-5p      |
| hsa_circ_0130619       | hsa-miR-5787         |
| hsa_circ_0130619       | hsa-miR-4270         |
| hsa_circ_0130619       | hsa-miR-149-3p       |
| hsa_circ_0130619       | hsa-miR-6743-5p      |
| hsa_circ_0059817       | hsa-miR-6505-5p      |
| hsa_circ_0059817       | hsa-miR-4649-3p      |
| hsa_circ_0059817       | hsa-mir-4314         |
| hsa_circ_0059817       | hsa-mir-4417         |
| hsa_circ_0059817       | hsa-mir-4530         |
| hsa_circ_0059817       | hsa-miR-1207-5p      |
| hsa_circ_0059817       | hsa-miR-6775-5p      |
| hsa_circ_0059817       | hsa-miR-6743-5p      |
| hsa_circ_0011489       | hsa-mir-4675         |
| hsa_circ_0011489       | hsa-miR-1236-3p      |
| hsa_circ_0011489       | hsa-miR-6792-3p      |
| hsa_circ_0011489       | hsa-mir-4314         |
| hsa_circ_0011489       | hsa-mir-4487         |
| hsa_circ_0011489       | hsa-miR-6775-5p      |
| hsa_circ_0011489       | hsa-miR-1207-5p      |
| hsa_circ_0011489       | hsa-miR-4270         |
| hsa_circ_0011489       | hsa-miR-5787         |
| hsa_circ_0011489       | hsa-miR-6743-5p      |
| hsa_circ_0011489       | hsa-miR-149-3p       |
| hsa_circ_0094266       | hsa-miR-1236-3p      |
| hsa_circ_0094266       | hsa-miR-149-3p       |

**Table S2. miRNA-mRNA interaction pairs**

| <b>Up-regulation</b> | <b>Down-regulation</b> |
|----------------------|------------------------|
| hsa-miR-7106-3p      | PLEKHG4B               |
| hsa-miR-7106-3p      | PTPRJ                  |
| hsa-miR-6792-3p      | PLCXD3                 |
| hsa-miR-6792-3p      | MMP2                   |
| hsa-miR-6792-3p      | ZNF652                 |
| hsa-miR-6792-3p      | SLC25A4                |
| hsa-miR-6775-5p      | HNRNPC                 |
| hsa-miR-6743-5p      | MKNK2                  |
| hsa-miR-6505-5p      | SLC25A37               |
| hsa-miR-5787         | MNT                    |
| hsa-miR-5787         | RAP1GAP2               |
| hsa-miR-4649-3p      | APAF1                  |
| hsa-miR-4649-3p      | TFCP2L1                |
| hsa-miR-4649-3p      | QSOX1                  |
| hsa-miR-4649-3p      | CRY2                   |
| hsa-mir-4530         | ORC4                   |
| hsa-mir-4487         | SETD3                  |
| hsa-mir-4487         | AP1G1                  |
| hsa-miR-4270         | ZNF471                 |
| hsa-miR-4270         | MNT                    |
| hsa-miR-4270         | PCSK2                  |
| hsa-miR-4270         | KRT80                  |
| hsa-miR-4270         | SOAT1                  |
| hsa-miR-3124-3p      | ALDH18A1               |
| hsa-miR-3124-3p      | LRP6                   |
| hsa-miR-3124-3p      | ID4                    |
| hsa-miR-3124-3p      | ZNF138                 |
| hsa-mir-2113         | SOCS1                  |
| hsa-mir-2113         | SLC38A1                |
| hsa-mir-2113         | ELL2                   |
| hsa-miR-1976         | GK5                    |
| hsa-miR-1976         | ZNF667                 |
| hsa-miR-1236-3p      | PIGR                   |
| hsa-miR-1236-3p      | ZCCHC2                 |
| hsa-miR-1236-3p      | TM9SF3                 |
| hsa-miR-1207-5p      | ZNF471                 |
| hsa-miR-1207-5p      | MNT                    |
| hsa-miR-1207-5p      | EDAR                   |
| hsa-miR-1207-5p      | FOLR1                  |
| hsa-miR-1207-5p      | KRT80                  |
| hsa-miR-1207-5p      | PPM1L                  |
| hsa-miR-1207-5p      | HDLBP                  |
| hsa-miR-1207-5p      | ACACA                  |
| hsa-mir-765          | SAMD4B                 |
| hsa-mir-765          | SLITRK5                |
| hsa-mir-765          | NFIX                   |
| hsa-mir-765          | RAB2A                  |
| hsa-mir-765          | SIX3                   |
| hsa-mir-765          | ATG13                  |
| hsa-miR-619-3p       | RNF128                 |
| hsa-miR-149-3p       | SLITRK5                |
| hsa-miR-149-3p       | NFIX                   |
| hsa-miR-149-3p       | PIGR                   |
| hsa-miR-149-3p       | CHST1                  |
| hsa-miR-149-3p       | MNT                    |
| hsa-miR-149-3p       | DUSP4                  |

|                |          |
|----------------|----------|
| hsa-miR-149-3p | KRT80    |
| hsa-miR-149-3p | ATP2A3   |
| hsa-miR-149-3p | PLEKHH1  |
| hsa-miR-149-3p | RAD51B   |
| hsa-miR-149-3p | TMEM120B |
| hsa-miR-149-3p | ENTPD7   |
| hsa-miR-149-3p | MORC4    |
| hsa-miR-149-3p | MLEC     |
| hsa-miR-149-3p | GCDH     |
| hsa-miR-149-3p | CRIP1    |
| hsa-miR-149-3p | MKNK2    |
| hsa-miR-149-3p | MSMO1    |

---

**Table S2. miRNA-mRNA interaction pairs**

| <b>Down-regulation</b> | <b>Up-regulation</b> |
|------------------------|----------------------|
| hsa_miR-6856-5p        | RPS6KA3              |
| hsa_miR-6856-5p        | LAPTM4B              |
| hsa_miR-6856-5p        | SFMBT2               |
| hsa_miR-6856-5p        | CBX6                 |
| hsa_miR-6856-5p        | TMEM43               |
| hsa-miR-518c-5p        | C1R                  |
| hsa-miR-769-3p         | STMN1                |
| hsa-miR-1260b          | NCAPG2               |
| hsa-miR-1260b          | ZNF367               |
| hsa-miR-1260b          | SMOC1                |
| hsa-miR-3605-5p        | CAMK4                |
| hsa-miR-3605-5p        | ADAM12               |
| hsa-miR-6507-5p        | RACGAP1              |
| hsa-miR-6507-5p        | STK4                 |
| hsa-miR-6507-5p        | CHEK1                |
| hsa-miR-6507-5p        | MOB1A                |
| hsa-miR-6507-5p        | SNX10                |
| hsa-miR-6507-5p        | PRC1                 |
| hsa-miR-6507-5p        | ITGB8                |
| hsa-miR-6793-5p        | PLIN3                |

**Table S3. GO enrichment analysis results**

| <b>Term</b>                                       | <b>Count</b> | <b>Pvalue</b> | <b>group</b> |
|---------------------------------------------------|--------------|---------------|--------------|
| tube formation                                    | 5            | 0.000323188   | BP           |
| stem cell proliferation                           | 3            | 0.012498254   | BP           |
| neutrophil degranulation                          | 5            | 0.045455426   | BP           |
| positive regulation of cell cycle                 | 4            | 0.071340266   | BP           |
| neutrophil activation involved in immune response | 5            | 0.046459888   | BP           |
| neutrophil activation                             | 5            | 0.049903986   | BP           |
| regulation of cell cycle G2/M phase transition    | 2            | 0.210914398   | BP           |
| fibrillar center                                  | 4            | 0.001780348   | CC           |
| extrinsic component of membrane                   | 4            | 0.028354204   | CC           |
| nuclear membrane                                  | 4            | 0.028659877   | CC           |
| protein serine/threonine kinase activity          | 5            | 0.038523518   | MF           |
| kinase regulator activity                         | 4            | 0.011583666   | MF           |
| transcription corepressor activity                | 4            | 0.01843276    | MF           |

**Table S4: KEGG enrichment analysis results**

| <b>Term</b>                                     | <b>Count</b> | <b>Pvalue</b> |
|-------------------------------------------------|--------------|---------------|
| Long-term potentiation                          | 2            | 0.039176824   |
| p53 signaling pathway                           | 2            | 0.045759395   |
| Arrhythmogenic right ventricular cardiomyopathy | 2            | 0.050359342   |
| Longevity regulating pathway                    | 2            | 0.065093696   |
| Insulin signaling pathway                       | 3            | 0.025980017   |
| Spinocerebellar ataxia                          | 3            | 0.029012191   |
| MAPK signaling pathway                          | 5            | 0.01146885    |
| Cell cycle                                      | 2            | 0.114618953   |
| Alzheimer disease                               | 5            | 0.032383311   |
